# Supplementary material for: Crystalline structure of an ammonia borane–polyethylene oxide cocrystal: a material investigated for its hydrogen storage potential
Source: Royal Society of Chemistry journal article supplement (doi:10.1039/c8ce00872h), 2018-01-01
Supplement: c8ce00872h1.pdf [file c8ce00872h1.pdf]

## Supporting Information

### Crystalline Structure of an Ammonia Borane – Polyethylene Oxide Cocrystal: A Material Investigated for its Hydrogen Storage Potential

Anna R. Ploszajski, Matthew Billing, Jeremy K. Cockcroft, and Neal Skipper

| Table of Contents                                                  | Page No. |
|--------------------------------------------------------------------|----------|
| <b>Additional Experimental Details</b>                             |          |
| Single crystal X-ray diffraction measurements and analysis.        | 1        |
| <b>List of Tables</b>                                              |          |
| <b>SXD data on <math>C_{10}H_{20}O_5 \cdot NH_3BH_3</math>.</b>    |          |
| Table S1. Crystal data and structure refinement.                   | 2        |
| Table S2. Fractional atomic coordinates and $U(eq)$ for all atoms. | 3        |
| Table S3. Anisotropic displacement parameters.                     | 4        |
| Table S4. Selected bond lengths.                                   | 4        |
| Table S5. Selected bond angles.                                    | 5        |
| Table S6. Selected torsion angles.                                 | 5        |
| <b>List of Figures</b>                                             |          |
| Figure S1. Crystal used for the single crystal study.              | 6        |
| Figure S2. Comparison of PXRD patterns with calculated pattern.    | 6        |
| Figure S3. Optical micrograph of the form previously published.    | 7        |

#### Single crystal X-ray diffraction measurements and analysis

A single crystal of the prepared cocrystal was held in a Hampton Research nylon loop (20  $\mu$ m thickness, 0.9 mm diameter, shown in Figure S1). The sample was cooled to 150 K and measurements were made using a twin-source SuperNova diffractometer with a micro-focus Cu X-ray beam (50 kV, 0.8 mA), an Atlas (135 mm CCD) detector, and the sample temperature was controlled with an Oxford Instruments Cryojet5. Full spheres of data were collected. The data were processed with the CrysAlisPro software package (version 1.171.38.43) from Rigaku Oxford Diffraction. Crystal structures of each phase were solved and refined by least-squares within the Olex2 program suite<sup>1</sup> using the ShelXS structure solution program and the ShelXL 2014 refinement program<sup>2</sup>.

---

<sup>1</sup> O. V. Dolomanov, L. J. Bourhis, R. J. Gildea, J. A. K. Howard, H. Puschmann, *J. Appl. Crystallogr.* 2009, **42**, 339-341.

<sup>2</sup> G. M. Sheldrick, *Acta Crystallogr.* 2015, **C71**, 3-8.

**Table S1:** Crystal data and structure refinement for C<sub>10</sub>H<sub>20</sub>O<sub>5</sub>·NH<sub>3</sub>BH<sub>3</sub>.

|                                                              |                                                                              |
|--------------------------------------------------------------|------------------------------------------------------------------------------|
| Identification code                                          | xstr0748                                                                     |
| Empirical formula                                            | C <sub>10</sub> H <sub>26</sub> BNO <sub>5</sub>                             |
| Formula weight                                               | 251.13                                                                       |
| Temperature / K                                              | 150                                                                          |
| Crystal system                                               | monoclinic                                                                   |
| Space group                                                  | <i>P</i> 2 <sub>1</sub> / <i>n</i>                                           |
| <i>a</i> / Å                                                 | 8.42518(12)                                                                  |
| <i>b</i> / Å                                                 | 8.39871(16)                                                                  |
| <i>c</i> / Å                                                 | 20.2469(3)                                                                   |
| $\alpha$ / °                                                 | 90                                                                           |
| $\beta$ / °                                                  | 91.5852(13)                                                                  |
| $\gamma$ / °                                                 | 90                                                                           |
| Volume / Å <sup>3</sup>                                      | 1432.13(4)                                                                   |
| <i>Z</i>                                                     | 4                                                                            |
| $\rho_{\text{calc}}$ / g cm <sup>-3</sup>                    | 1.165                                                                        |
| $\mu$ / mm <sup>-1</sup>                                     | 0.740                                                                        |
| <i>F</i> (000)                                               | 552.0                                                                        |
| Crystal size / mm <sup>3</sup>                               | 0.317 × 0.106 × 0.024                                                        |
| Radiation                                                    | CuK $\alpha$ ( $\lambda$ = 1.54184)                                          |
| 2 $\theta$ range for data collection / °                     | 8.738 to 148.816                                                             |
| Index ranges                                                 | -10 ≤ <i>h</i> ≤ 10, -9 ≤ <i>k</i> ≤ 10, -25 ≤ <i>l</i> ≤ 24                 |
| Reflections collected                                        | 21539                                                                        |
| Independent reflections                                      | 2909 [ <i>R</i> <sub>int</sub> = 0.0257, <i>R</i> <sub>sigma</sub> = 0.0134] |
| Data/restraints/parameters                                   | 2909/0/156                                                                   |
| Goodness-of-fit on <i>F</i> <sup>2</sup>                     | 1.030                                                                        |
| Final <i>R</i> indexes [ <i>I</i> ≥ 2 $\sigma$ ( <i>I</i> )] | <i>R</i> <sub>1</sub> = 0.0587, <i>wR</i> <sub>2</sub> = 0.1684              |
| Final <i>R</i> indexes [all data]                            | <i>R</i> <sub>1</sub> = 0.0628, <i>wR</i> <sub>2</sub> = 0.1726              |
| Largest diff. peak/hole / e Å <sup>-3</sup>                  | 0.82/-0.34                                                                   |

**Table S2:** Fractional Atomic Coordinates (×10<sup>4</sup>) and Equivalent Isotropic Displacement Parameters (Å<sup>2</sup>×10<sup>3</sup>) for C<sub>10</sub>H<sub>20</sub>O<sub>5</sub>·NH<sub>3</sub>BH<sub>3</sub>. *U*<sub>eq</sub> is defined as 1/3 of the trace of the orthogonalised *U*<sub>ij</sub> tensor

| Atom | <i>x</i>   | <i>y</i>    | <i>z</i>   | <i>U</i> (eq) |
|------|------------|-------------|------------|---------------|
| O(1) | 5830.3(15) | 4620.2(16)  | 3491.2(6)  | 42.6(3)       |
| O(2) | 3265.1(14) | 5713.3(15)  | 4294.7(6)  | 39.7(3)       |
| O(3) | 1537.8(15) | 8487.6(17)  | 3956.8(6)  | 44.3(3)       |
| O(4) | 2831.8(14) | 10857.8(16) | 3146.8(6)  | 40.4(3)       |
| O(5) | 5467.8(17) | 9992.6(16)  | 2350.7(8)  | 49.9(4)       |
| C(1) | 7492(2)    | 4496(3)     | 3417.7(10) | 47.5(5)       |
| C(2) | 5342(3)    | 3894(3)     | 4094.4(9)  | 51.0(5)       |

|        |            |          |            |         |
|--------|------------|----------|------------|---------|
| C(3)   | 3620(3)    | 4086(2)  | 4170.8(10) | 49.9(5) |
| C(4)   | 1653(2)    | 5931(3)  | 4443.9(10) | 48.4(5) |
| C(5)   | 1324(2)    | 7651(3)  | 4557.4(10) | 51.6(5) |
| C(6)   | 1077(2)    | 10121(3) | 3986.1(11) | 52.1(5) |
| C(7)   | 1213(2)    | 10827(2) | 3312.4(11) | 48.6(5) |
| C(8)   | 3082(2)    | 11460(2) | 2496.8(9)  | 45.2(5) |
| C(9)   | 4813(2)    | 11545(2) | 2388.6(9)  | 43.3(4) |
| C(10)  | 7141(2)    | 10033(3) | 2263.1(11) | 52.5(5) |
| N(1)   | 5162.6(19) | 8321(2)  | 3675.5(10) | 52.2(5) |
| B(1)   | 6739(3)    | 8871(4)  | 4064.8(16) | 65.3(8) |
| H(1A)  | 7839       | 3380     | 3484       | 57      |
| H(1B)  | 8056       | 5172     | 3749       | 57      |
| H(2A)  | 5917       | 4393     | 4474       | 61      |
| H(2B)  | 5613       | 2747     | 4090       | 61      |
| H(3A)  | 3048       | 3729     | 3763       | 60      |
| H(3B)  | 3265       | 3421     | 4543       | 60      |
| H(4A)  | 1401       | 5314     | 4844       | 58      |
| H(4B)  | 970        | 5535     | 4073       | 58      |
| H(5A)  | 222        | 7791     | 4705       | 62      |
| H(5B)  | 2057       | 8072     | 4906       | 62      |
| H(6A)  | 1775       | 10700    | 4306       | 63      |
| H(6B)  | -31        | 10207    | 4133       | 63      |
| H(7A)  | 599        | 10181    | 2986       | 58      |
| H(7B)  | 776        | 11921    | 3307       | 58      |
| H(8A)  | 2605       | 12532    | 2450       | 54      |
| H(8B)  | 2570       | 10750    | 2164       | 54      |
| H(9A)  | 5006       | 12128    | 1973       | 52      |
| H(9B)  | 5339       | 12137    | 2757       | 52      |
| H(10A) | 7679       | 9329     | 2591       | 63      |
| H(10B) | 7540       | 11131    | 2334       | 63      |
| H(1C)  | 4299       | 8643     | 3900       | 78      |
| H(1D)  | 5155       | 7242     | 3638       | 78      |
| H(1E)  | 5134       | 8766     | 3265       | 78      |
| H(1F)  | 6860       | 10027    | 4025       | 98      |
| H(1G)  | 7659       | 8340     | 3877       | 98      |
| H(1H)  | 6667       | 8584     | 4532       | 98      |

**Table S3:** Anisotropic displacement parameters ( $\text{\AA}^2 \times 10^3$ ) for  $\text{C}_{10}\text{H}_{20}\text{O}_5 \cdot \text{NH}_3\text{BH}_3$ . Anisotropic displacement factor exponent has the form:  $-2\pi^2[h^2a^*2U_{11}+2hka^*b^*U_{12}+\dots]$ .

| Atom  | $U_{11}$ | $U_{22}$ | $U_{33}$ | $U_{23}$  | $U_{13}$  | $U_{12}$  |
|-------|----------|----------|----------|-----------|-----------|-----------|
| O(1)  | 44.7(7)  | 43.7(7)  | 39.4(7)  | -3.0(5)   | -0.7(5)   | 2.8(5)    |
| O(2)  | 39.0(7)  | 39.0(7)  | 41.4(7)  | -1.5(5)   | 3.5(5)    | -8.1(5)   |
| O(3)  | 38.7(7)  | 49.8(8)  | 44.7(7)  | -12.0(6)  | 6.0(5)    | -1.0(5)   |
| O(4)  | 32.3(6)  | 43.2(7)  | 45.2(7)  | -2.6(5)   | -6.7(5)   | 4.2(5)    |
| O(5)  | 42.8(7)  | 40.9(8)  | 66.1(9)  | 1.1(6)    | 5.5(6)    | 0.1(6)    |
| C(1)  | 43.4(10) | 50.3(11) | 48.6(11) | -4.2(8)   | -3.6(8)   | 4.5(8)    |
| C(2)  | 69.6(13) | 46.9(11) | 36.6(9)  | 4.1(8)    | 3.5(9)    | 11.5(10)  |
| C(3)  | 68.4(13) | 38.0(10) | 43.6(10) | 0.3(8)    | 7.9(9)    | -10.7(9)  |
| C(4)  | 38.5(9)  | 64.7(13) | 42.2(10) | 3.5(9)    | 4.0(7)    | -15.9(9)  |
| C(5)  | 33.2(9)  | 78.5(15) | 43.4(10) | -11.5(10) | 6.9(7)    | -0.8(9)   |
| C(6)  | 31.3(9)  | 55.4(12) | 70.0(13) | -27.5(10) | 8.1(8)    | -2.8(8)   |
| C(7)  | 31.4(9)  | 42.5(10) | 71.4(13) | -14.4(9)  | -7.1(8)   | 4.8(7)    |
| C(8)  | 52.8(11) | 38.8(10) | 43.1(10) | 0.3(7)    | -11.9(8)  | 9.6(8)    |
| C(9)  | 54.6(11) | 35.1(9)  | 40.1(9)  | 2.4(7)    | -2.5(8)   | 0.1(8)    |
| C(10) | 41.8(10) | 58.4(13) | 57.2(12) | -0.7(10)  | 2.2(8)    | 3.0(9)    |
| N(1)  | 34.8(8)  | 46.7(10) | 74.7(12) | 19.3(8)   | -4.1(7)   | -4.5(7)   |
| B(1)  | 57.8(15) | 55.1(15) | 81.4(19) | 10.3(14)  | -26.1(13) | -13.7(12) |

**Table S4:** Bond Lengths for  $\text{C}_{10}\text{H}_{20}\text{O}_5 \cdot \text{NH}_3\text{BH}_3$

| Atom — Atom | Length / $\text{\AA}$ | Atom — Atom               | Length / $\text{\AA}$ |
|-------------|-----------------------|---------------------------|-----------------------|
| O(1) — C(1) | 1.416(2)              | O(5) — C(10)              | 1.426(2)              |
| O(1) — C(2) | 1.435(2)              | C(1) — C(10) <sup>1</sup> | 1.491(3)              |
| O(2) — C(3) | 1.423(2)              | C(2) — C(3)               | 1.472(3)              |
| O(2) — C(4) | 1.412(2)              | C(4) — C(5)               | 1.490(3)              |
| O(3) — C(5) | 1.420(3)              | C(6) — C(7)               | 1.495(3)              |
| O(3) — C(6) | 1.427(3)              | C(8) — C(9)               | 1.482(3)              |
| O(4) — C(7) | 1.414(2)              | C(10) — C(1) <sup>2</sup> | 1.491(3)              |
| O(4) — C(8) | 1.431(2)              | N(1) — B(1)               | 1.594(3)              |
| O(5) — C(9) | 1.419(2)              |                           |                       |

<sup>1</sup> x, y, 1/2-z and <sup>2</sup> x, y, 1/2-z

**Table S5:** Selected bond angles for C<sub>10</sub>H<sub>20</sub>O<sub>5</sub>·NH<sub>3</sub>BH<sub>3</sub>

| Atom | — | Atom  | — | Atom               | Angle / °  |
|------|---|-------|---|--------------------|------------|
| C(1) | — | O(1)  | — | C(2)               | 111.43(15) |
| C(4) | — | O(2)  | — | C(3)               | 111.73(15) |
| C(5) | — | O(3)  | — | C(6)               | 113.49(16) |
| C(7) | — | O(4)  | — | C(8)               | 113.10(15) |
| C(9) | — | O(5)  | — | C(10)              | 111.82(15) |
| O(1) | — | C(1)  | — | C(10) <sup>1</sup> | 107.79(16) |
| O(1) | — | C(2)  | — | C(3)               | 110.44(16) |
| O(2) | — | C(3)  | — | C(2)               | 109.62(16) |
| O(2) | — | C(4)  | — | C(5)               | 110.05(15) |
| O(3) | — | C(5)  | — | C(4)               | 108.62(15) |
| O(3) | — | C(6)  | — | C(7)               | 108.39(15) |
| O(4) | — | C(7)  | — | C(6)               | 108.81(15) |
| O(4) | — | C(8)  | — | C(9)               | 108.89(14) |
| O(5) | — | C(9)  | — | C(8)               | 110.42(15) |
| O(5) | — | C(10) | — | C(1) <sup>2</sup>  | 109.79(17) |

**Table S6:** Selected torsion angles for C<sub>10</sub>H<sub>20</sub>O<sub>5</sub>·NH<sub>3</sub>BH<sub>3</sub>

| A     | B     | C                 | D                  | Angle/°     |
|-------|-------|-------------------|--------------------|-------------|
| O(1)  | C(2)  | C(3)              | O(2)               | -69.5(2)    |
| O(2)  | C(4)  | C(5)              | O(3)               | 65.15(19)   |
| O(3)  | C(6)  | C(7)              | O(4)               | -66.42(19)  |
| O(4)  | C(8)  | C(9)              | O(5)               | 68.79(19)   |
| O(5)  | C(10) | C(1) <sup>1</sup> | O(1) <sup>1</sup>  | 177.56(16)  |
| C(1)  | O(1)  | C(2)              | C(3)               | 178.08(16)  |
| C(2)  | O(1)  | C(1)              | C(10) <sup>2</sup> | 170.91(17)  |
| C(3)  | O(2)  | C(4)              | C(5)               | -178.92(16) |
| C(4)  | O(2)  | C(3)              | C(2)               | -173.47(15) |
| C(5)  | O(3)  | C(6)              | C(7)               | -174.77(15) |
| C(6)  | O(3)  | C(5)              | C(4)               | 173.16(15)  |
| C(7)  | O(4)  | C(8)              | C(9)               | 176.24(15)  |
| C(8)  | O(4)  | C(7)              | C(6)               | 177.73(15)  |
| C(9)  | O(5)  | C(10)             | C(1) <sup>1</sup>  | -109.60(19) |
| C(10) | O(5)  | C(9)              | C(8)               | -178.54(16) |

<sup>1</sup> 1 $\frac{1}{2}$ -x, 1 $\frac{1}{2}$ +y, 1 $\frac{1}{2}$ -z; <sup>2</sup> 1 $\frac{1}{2}$ -x, y-1 $\frac{1}{2}$ , 1 $\frac{1}{2}$ -z

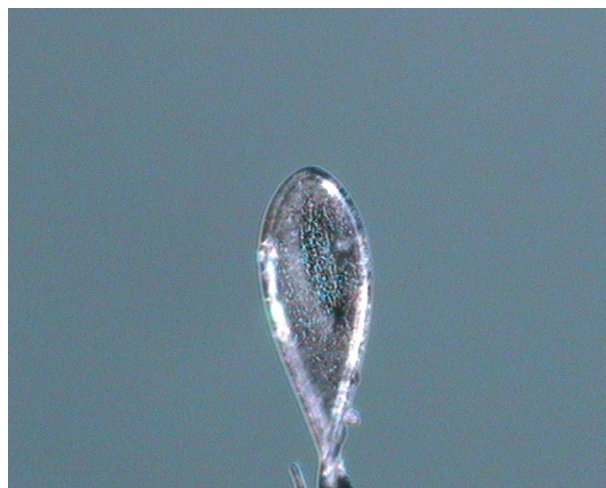

**Figure S1:** Crystal used for the single crystal study held in Hampton Research nylon loop suspended in a film of amorphous material formed by AB dissolved in PEO.

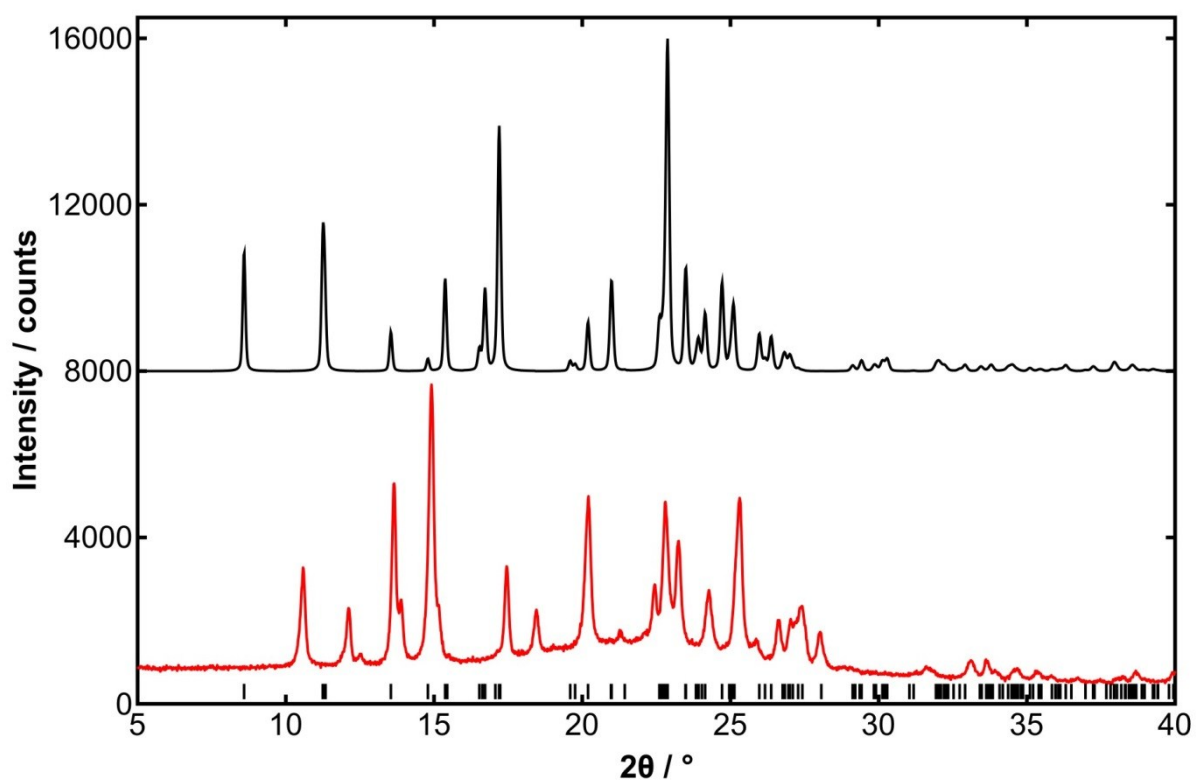

**Figure S2:** Powder X-ray diffraction pattern from the single cocrystal (black), and the powder X-ray diffraction pattern for the phase-pure cocrystal phase in a 30 wt% AB power sample, which was described in previous work<sup>3</sup>.

<sup>3</sup> A. R. Ploszajski, M. Billing, A. S. Nathanson, M. Vickers and S. M. Bennington. *Int. J. Hydrogen Energy*, 2018, 43, 5645–5656.

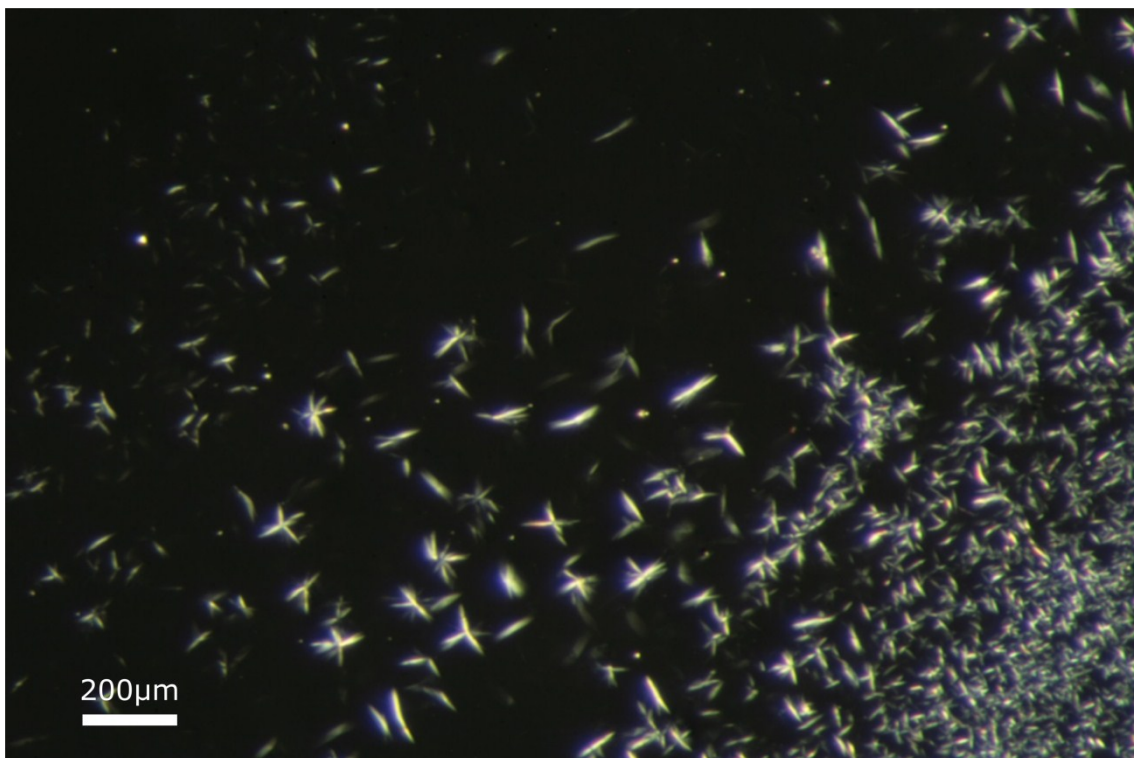

**Figure S3:** Optical micrograph of single crystals of the 30 wt% AB cocrystals which have the powder diffraction pattern matching a previously-found crystalline phase (Fig. S2), but have proven too small to isolate.
